# Supplementary material
Source: PubMed Central journal article supplement (PMC5340597)
Supplement: NIHMS843509-supplement-1.pdf [file NIHMS843509-supplement-1.pdf]

**Table S1: Antibody list**

| Target                | Clone    | Fluorochrome             | Vendor          |
|-----------------------|----------|--------------------------|-----------------|
| CD1a                  | HI149    | FITC                     | BD Biosciences  |
| CD1a                  | HI149    | eFluor 450               | eBioscience     |
| CD1a                  | HI149    | BV421                    | BioLegend       |
| CD3                   | OKT3     | eFluor 450               | eBioscience     |
| CD3                   | OKT3     | eFluor 650 <sup>NC</sup> | eBioscience     |
| CD3                   | UCHT1    | PE-CF594                 | BD Biosciences  |
| CD4                   | SK3      | PE-Cy7                   | BD Biosciences  |
| CD4                   | OKT4     | APC-Cy7                  | BioLegend       |
| CD7                   | M-T701   | FITC                     | BD Biosciences  |
| CD8( $\alpha$ )       | RPA-T8   | APC-eFluor 780           | eBioscience     |
| CD8( $\alpha$ )       | SK1      | FITC                     | BioLegend       |
| CD8 $\beta$           | 2ST8.5H7 | PE                       | Beckman Coulter |
| CD10                  | HI10a    | PE-Cy7                   | BD Biosciences  |
| CD25                  | 2A3      | FITC                     | BD Biosciences  |
| CD25                  | BC96     | APC                      | eBioscience     |
| CD25                  | BC96     | eFluor 450               | eBioscience     |
| CD27                  | L128     | PE                       | BD Biosciences  |
| CD27                  | L128     | APC                      | BD Biosciences  |
| CD27                  | eBioRDR5 | eFluor 650 <sup>NC</sup> | eBioscience     |
| CD28                  | CD28.2   | APC                      | BioLegend       |
| CD31                  | WM59     | PE                       | eBioscience     |
| CD31                  | WM59     | APC                      | eBioscience     |
| CD31                  | WM59     | eFluor 605 <sup>NC</sup> | eBioscience     |
| CD31                  | WM59     | Alexa Fluor 700          | BioLegend       |
| CD34                  | 8G12     | FITC                     | BD Biosciences  |
| CD34                  | 8G12     | APC                      | BD Biosciences  |
| CD34                  | 581      | PE-Cy7                   | BioLegend       |
| CD45RA                | HI100    | PerCP-Cy5.5              | eBioscience     |
| CD62L                 | SK11     | PE                       | BD Biosciences  |
| CD62L                 | DREG-56  | eFluor 605 <sup>NC</sup> | eBioscience     |
| CD69                  | L78      | FITC                     | BD Biosciences  |
| CD71                  | YDJ1.2.2 | FITC                     | BD Biosciences  |
| CD127                 | R34.34   | PE                       | Beckman Coulter |
| FoxP3                 | PCH101   | FITC                     | eBioscience     |
| FoxP3                 | PCH101   | eFluor 450               | eBioscience     |
| ICOS (CD278)          | ISA-3    | FITC                     | eBioscience     |
| Ki67                  | 20Raj1   | FITC                     | eBioscience     |
| TCRC $\beta$ 1        | Jovi-1   | FITC                     | Ancell          |
| TCR $\gamma\delta$    | 11F2     | FITC                     | BD Biosciences  |
| TCR $\gamma\delta$    | B1       | BV421                    | BioLegend       |
| Fixable Viability Dye |          | eFluor 455 (UV)          | eBioscience     |

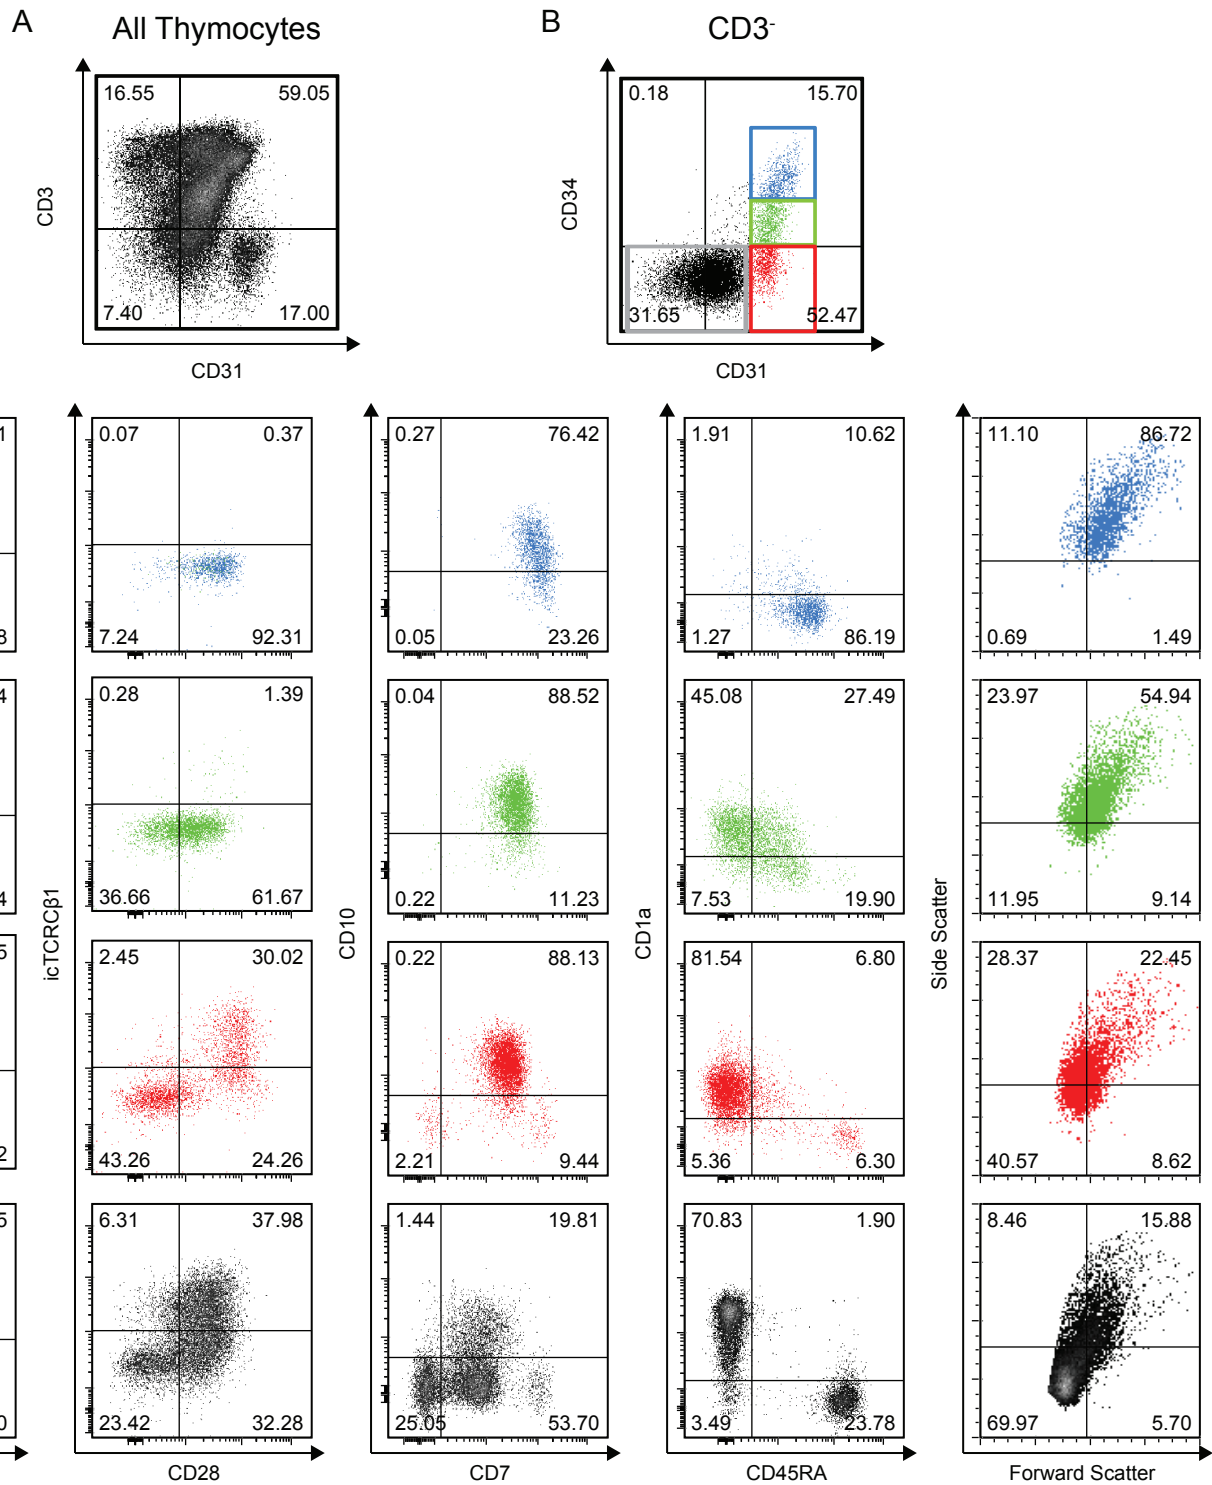

**Figure S1: Phenotype of CD3<sup>-</sup>CD31<sup>high</sup> thymocytes during down-regulation of CD34 expression.** CD3<sup>-</sup> thymocyte population was gated from all thymocytes (A), then gates were drawn for CD31<sup>high</sup> CD34<sup>high</sup>, CD34<sup>low</sup> and CD34<sup>-</sup> subsets and the CD31<sup>-low</sup> subset. (C) Expression of CD4, CD8, intracellular (ic) TCR Cβ1 chain, CD28, CD10, CD7, CD1a and CD45RA as well as forward and side scatter lights for the subsets described in B.

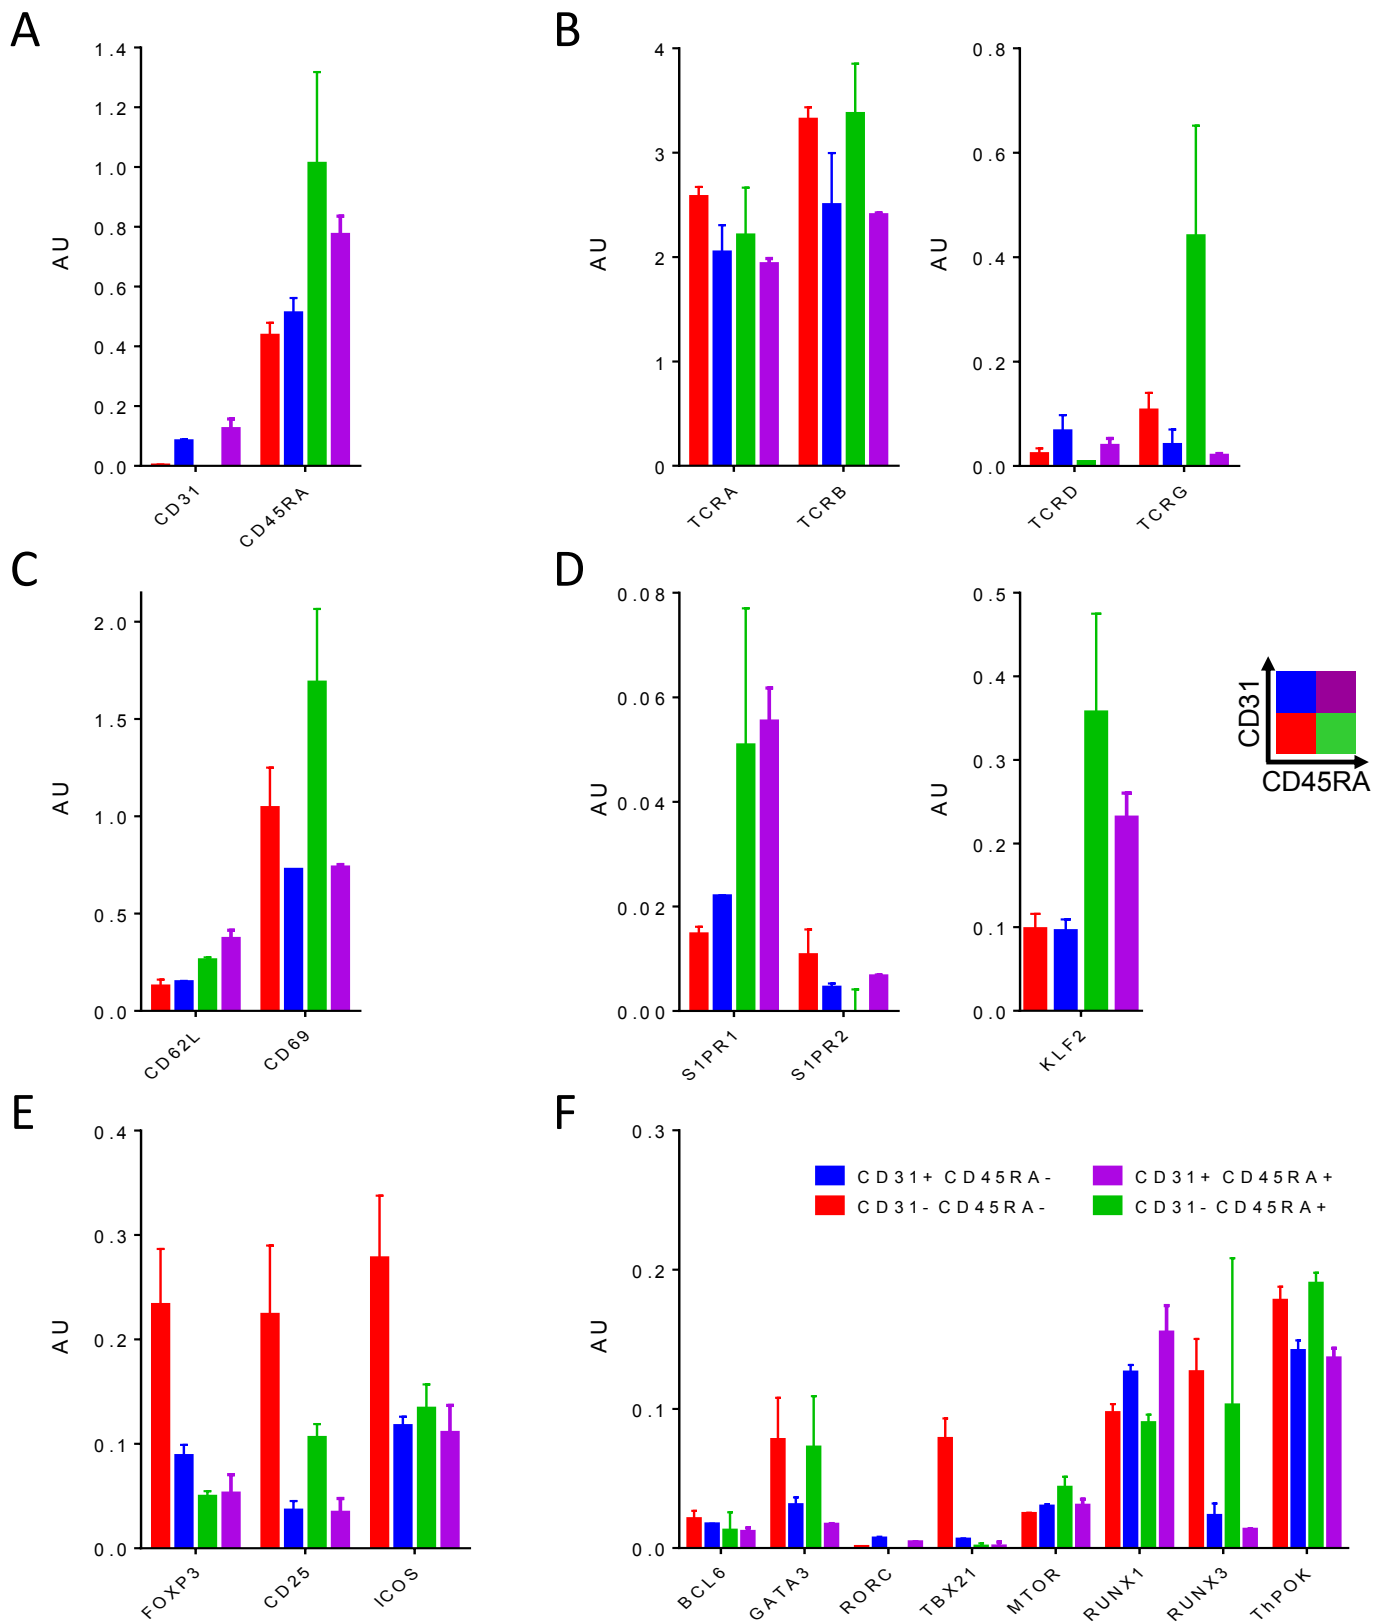

**Figure S2: Gene expression quantification was performed on human post-natal thymocytes.**

Four populations of CD3<sup>+</sup> CD27<sup>+</sup> CD4<sup>+</sup> CD8<sup>-</sup> cells were sorted based on their expression of CD31 and CD45RA prior to RNA extraction. (A) mRNA levels of CD31 and CD45RA confirm that the cells were properly sorted. (B) Expression of TCR $\alpha$ , TCR $\beta$ , TCR $\gamma$  and TCR $\delta$  chains. (C, D) CD62L and CD69 mRNA levels confirm data presented in Figure 5. High expression of S1P1 and KLF2 and reduced expression of S1P2 in CD45RA subsets confirm that these cell populations are ready to egress. (E) Higher expression levels of FoxP3, CD25 and ICOS in the CD31-CD45RA<sup>-</sup> subset confirms the flow cytometry data presented in Figure 6 and 7. (F) Expression of several transcription factors specific of Th1, Th2, Th17 or Treg lineages or involved in the CD4/CD8 lineage differentiation.

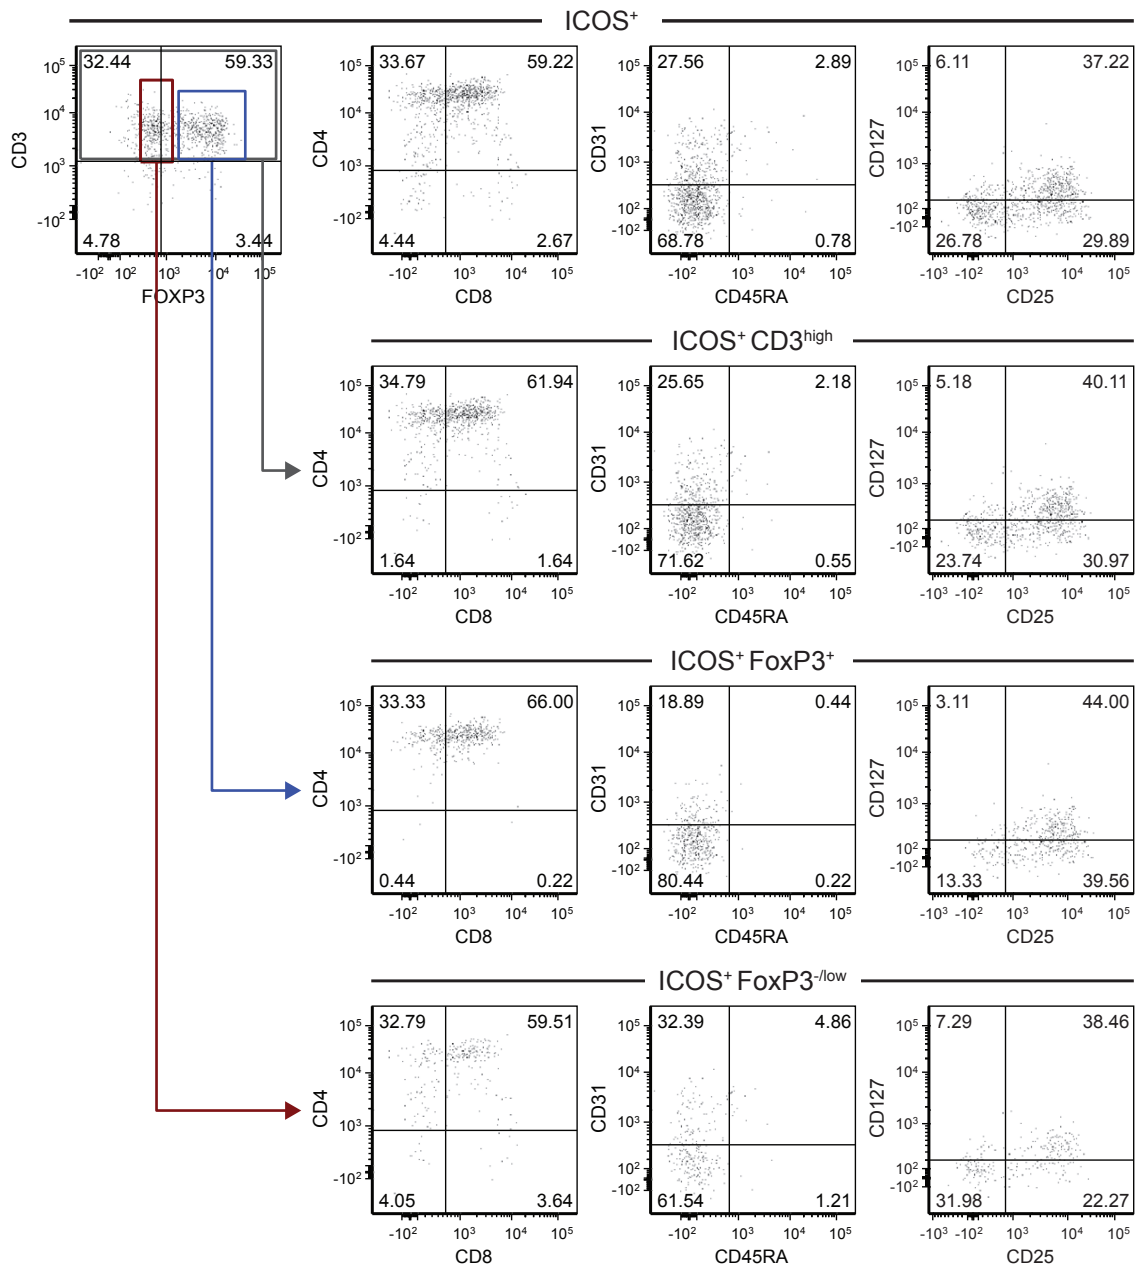

**Figure S3: Comparison of the phenotype of FoxP3<sup>+</sup> and FoxP3<sup>-/low</sup> subsets of ICOS<sup>+</sup> thymocytes.** ICOS-expressing thymocytes were gated as in Figure 7 then divided into a FoxP3<sup>+</sup> subset and a FoxP3<sup>-/low</sup> subset. Expression of CD4, CD8, CD31, CD45RA, CD25 and CD127 are displayed for all ICOS cells, ICOS<sup>+</sup>CD3<sup>high</sup> cells and FoxP3<sup>+</sup> and FoxP3<sup>-/low</sup> subsets of ICOS<sup>+</sup> thymocytes.
